# Supplementary material for: Fabrication of p-Cu2O/n-Bi-WO3heterojunction thin films: optical and photoelectrochemical properties
Source: Royal Society of Chemistry journal article supplement (doi:10.1039/c6nj02432g), 2016-12-13
Supplement: c6nj02432g1.pdf [file c6nj02432g1.pdf]

## Electronic Supplementary Information

### **Fabrication of p-Cu<sub>2</sub>O/n-Bi-WO<sub>3</sub> heterojunction thin films: optical and photoelectrochemical properties**

Jin You Zheng, Chang Woo Kim, Amol Uttam Pawar and Young Soo Kang\*

*Korea Center for Artificial Photosynthesis (KCAP), Department of Chemistry, Sogang University, Seoul 121-742, South Korea.*

*E-mail: yskang@sogang.ac.kr; Fax: (+82)-2-701-0967*

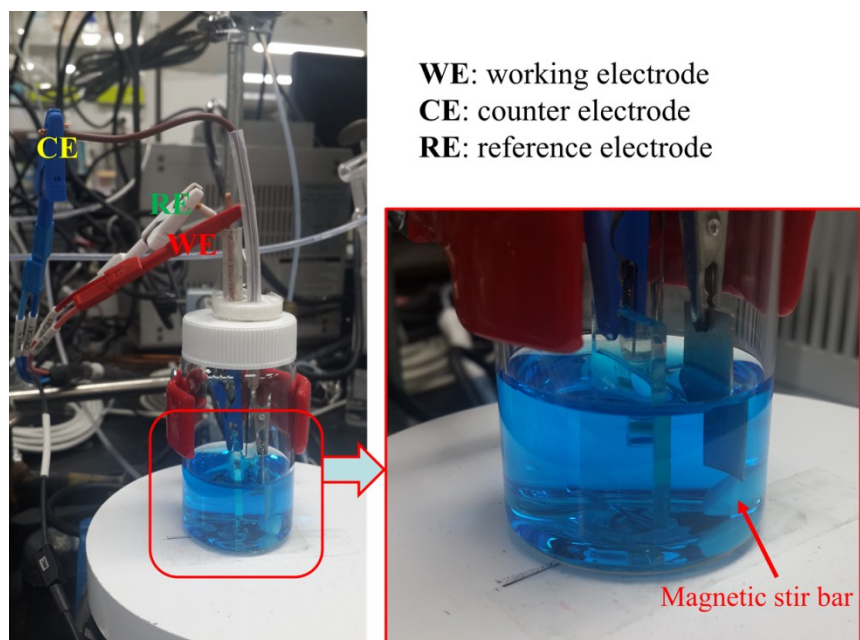

**Fig. S1** Photographs of a home-made cell for electrodeposition of  $\text{Cu}_2\text{O}$  films.

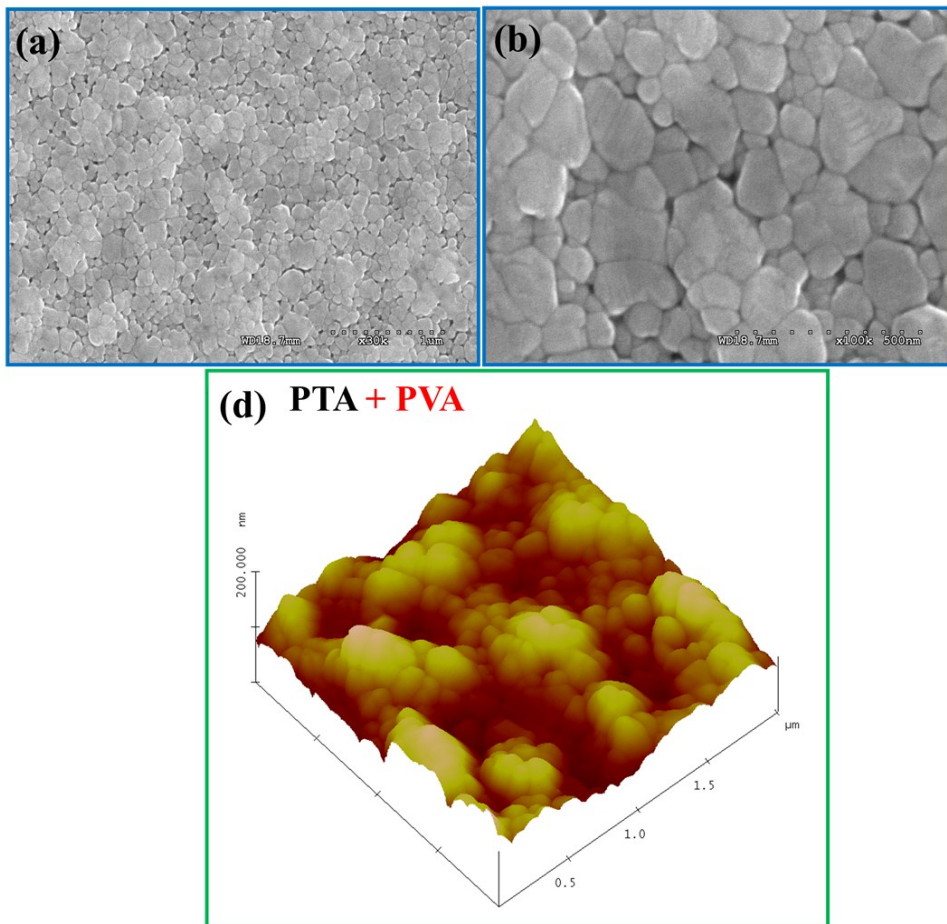

**Fig. S2** (a and b) SEM images and (c) AFM image of the  $\text{WO}_3$  thin film prepared by spin-coating of a PTA+PVA solution.

**PTA+PVA solution**<sup>[1]</sup>: a solution was prepared by dissolving 1.5 g of  $\text{H}_2\text{WO}_4$  and 0.5 g of poly(vinyl alcohol) (PVA) (Aldrich, 99+%) in 10 mL of 35 wt %  $\text{H}_2\text{O}_2$  (Junsei, 35%).

The  $\text{WO}_3$  was made by spin coating the PTA-PVA solution on FTO glass(1500 rpm for 20 s, Spin Coater ACE-200), followed by annealing at 500 °C for 2 h in air.

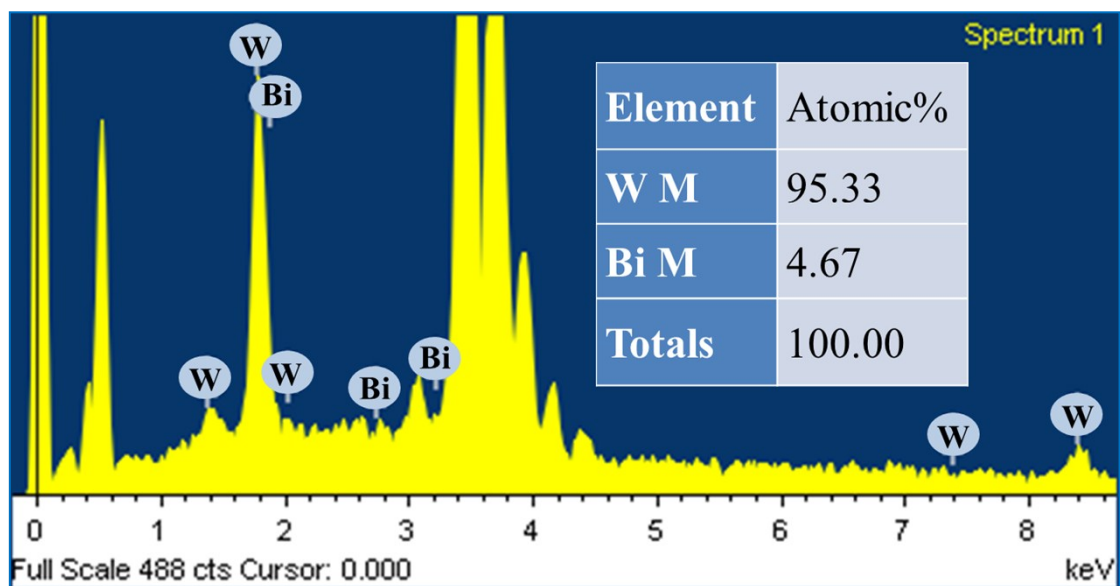

**Fig. S3** The typical EDS spectrum and its corresponding W and Bi elements atomic% data of the Bi-WO<sub>3</sub> film on FTO glass.

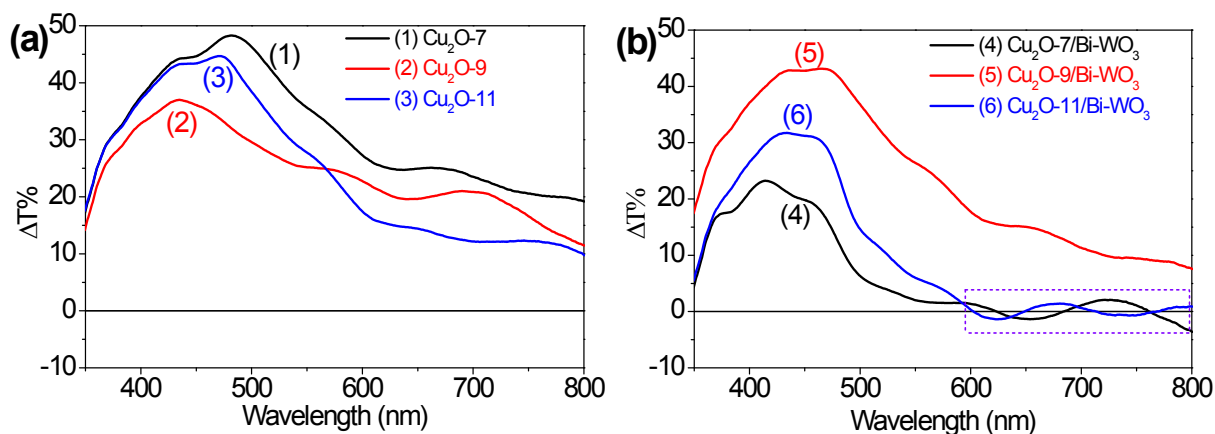

**Fig. S4** The transmittance differences ( $\Delta T$ ,  $\Delta T = T_{\text{FTO}} - T_{\text{sample}}$ ) between the bare FTO and the samples; (1) Cu<sub>2</sub>O-7, (2) Cu<sub>2</sub>O-9, (3) Cu<sub>2</sub>O-11, (4) Cu<sub>2</sub>O-7/Bi-WO<sub>3</sub>, (5) Cu<sub>2</sub>O-9/Bi-WO<sub>3</sub> and (6) Cu<sub>2</sub>O-11/Bi-WO<sub>3</sub>.

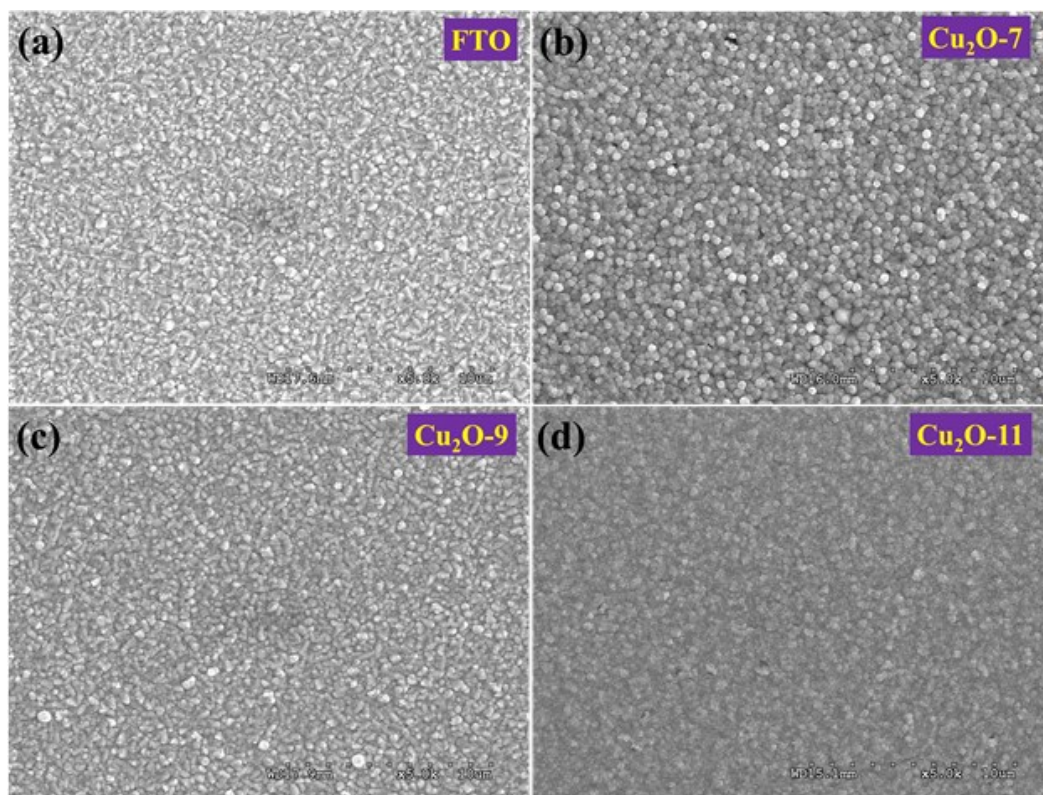

**Fig. S5** Low magnified SEM images of the bare FTO substrate and the electrodeposited Cu<sub>2</sub>O films at different pHs. (a) FTO substrate, (b) Cu<sub>2</sub>O-7, (c) Cu<sub>2</sub>O-9, (d) Cu<sub>2</sub>O-11.

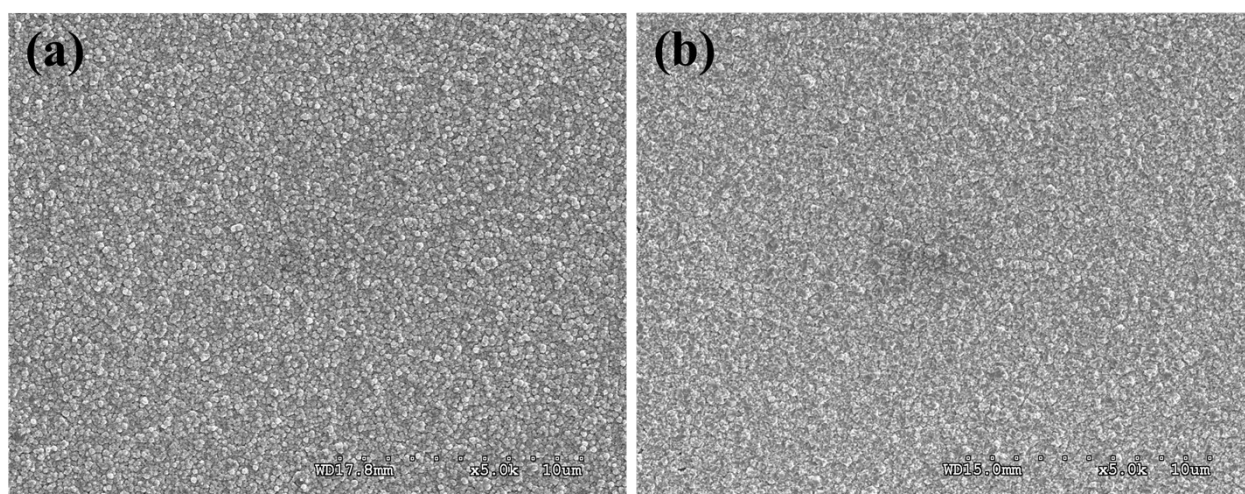

**Fig. S6** Low magnified SEM images of the electrodeposited  $\text{Cu}_2\text{O}$  films with stirring at different pHs. (a)  $\text{Cu}_2\text{O}$ -7s, (b)  $\text{Cu}_2\text{O}$ -11s.

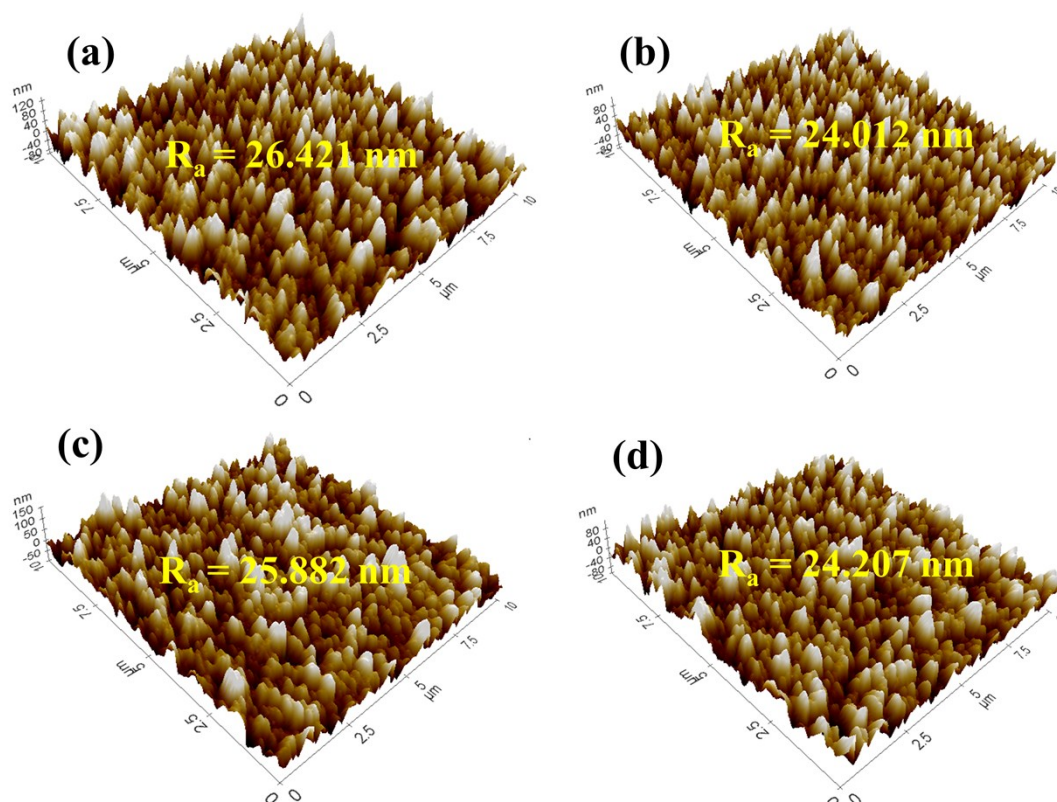

**Fig. S7** AFM 3D images of (a)  $\text{Cu}_2\text{O}$ -7, (b)  $\text{Cu}_2\text{O}$ -7s, (c)  $\text{Cu}_2\text{O}$ -11, (d)  $\text{Cu}_2\text{O}$ -11s. Average roughness ( $R_a$ ) is the mean height as calculated over the entire measured length in the specific area ( $10 \mu\text{m} \times 10 \mu\text{m}$ ).

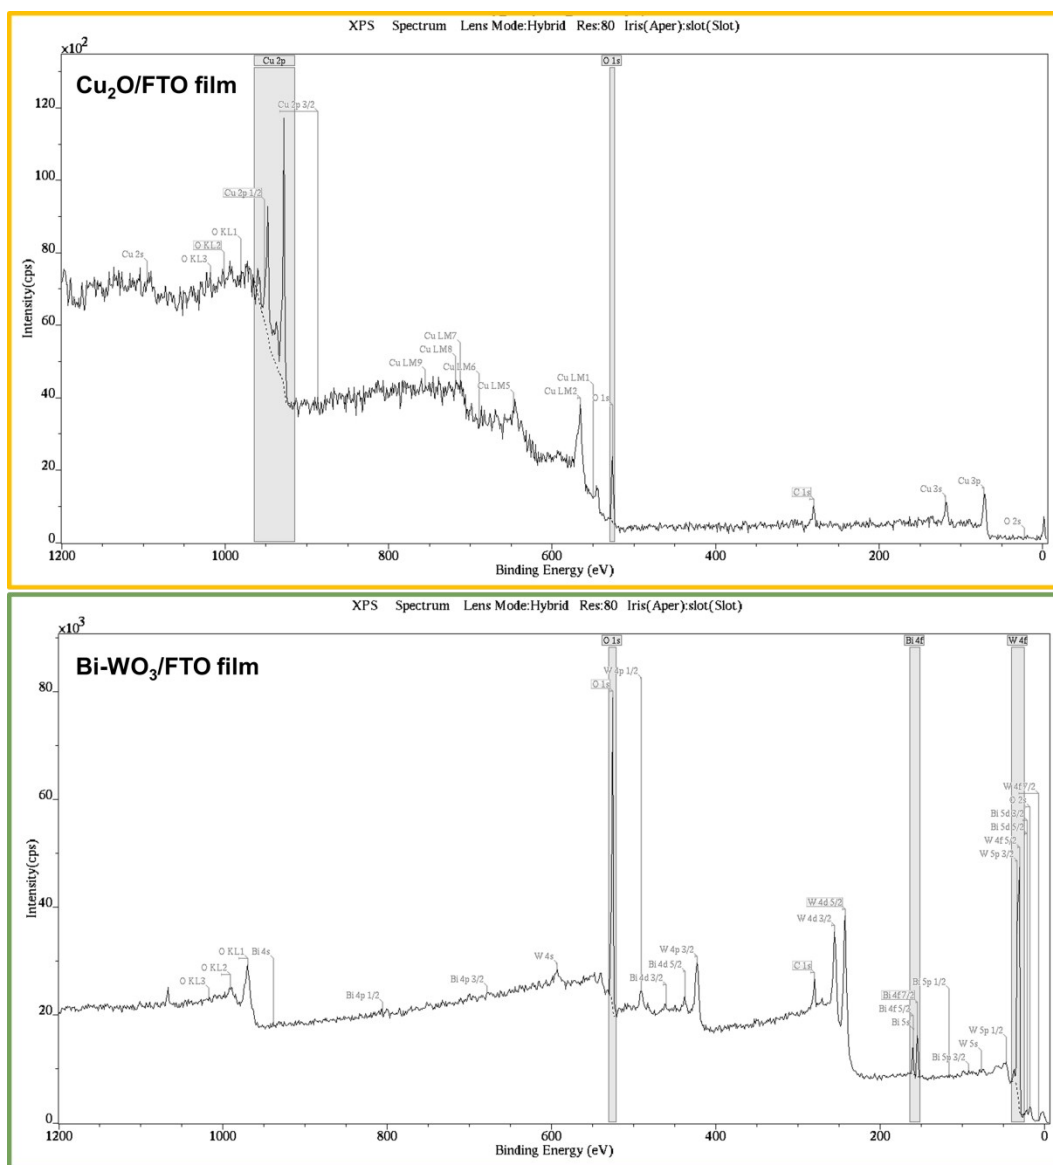

| Films                   | Peak  | Type | Position BE (eV) | FWHM (eV) | Raw Area (cps eV) | RSF   | Atomic Mass | Atomic Conc % | Mass Conc % |
|-------------------------|-------|------|------------------|-----------|-------------------|-------|-------------|---------------|-------------|
| Cu <sub>2</sub> O/FTO   | O 1s  | Reg  | 526.000          | 2.803     | 5146.1            | 0.780 | 15.999      | 43.07         | 16.00       |
|                         | Cu 2p | Reg  | 928.000          | 2.601     | 49782.0           | 5.321 | 63.549      | 56.93         | 84.00       |
| Bi-WO <sub>3</sub> /FTO | O 1s  | Reg  | 526.000          | 2.144     | 142291.8          | 0.780 | 15.999      | 76.62         | 22.06       |
|                         | W 4f  | Reg  | 31.000           | 3.870     | 167479.8          | 3.523 | 183.847     | 22.09         | 73.07       |
|                         | Bi 4f | Reg  | 155.000          | 1.929     | 25762.3           | 9.140 | 208.980     | 1.30          | 4.87        |

**Fig. S8** XPS quantification reports of Cu<sub>2</sub>O and Bi-WO<sub>3</sub> films by XPS survey spectra. The quantification is calculated according to the peak area.

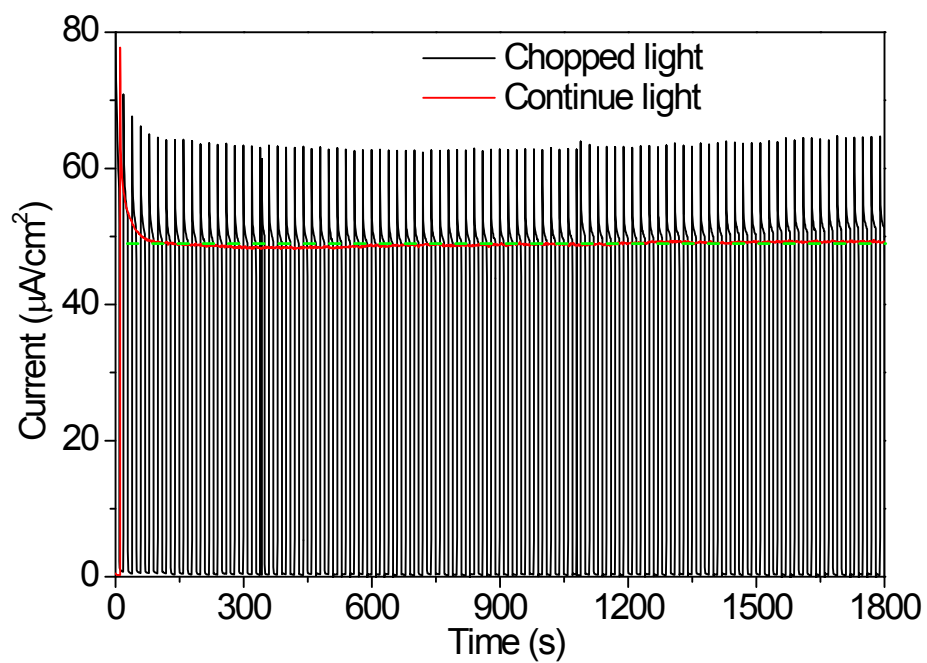

**Fig. S9** Stability measurements at +0.65 V of Bi-WO<sub>3</sub> film measured in 0.5 M Na<sub>2</sub>SO<sub>4</sub> electrolyte solution under a chopped 1 sun illumination (black color) and a continue 1 sun illumination (red color).



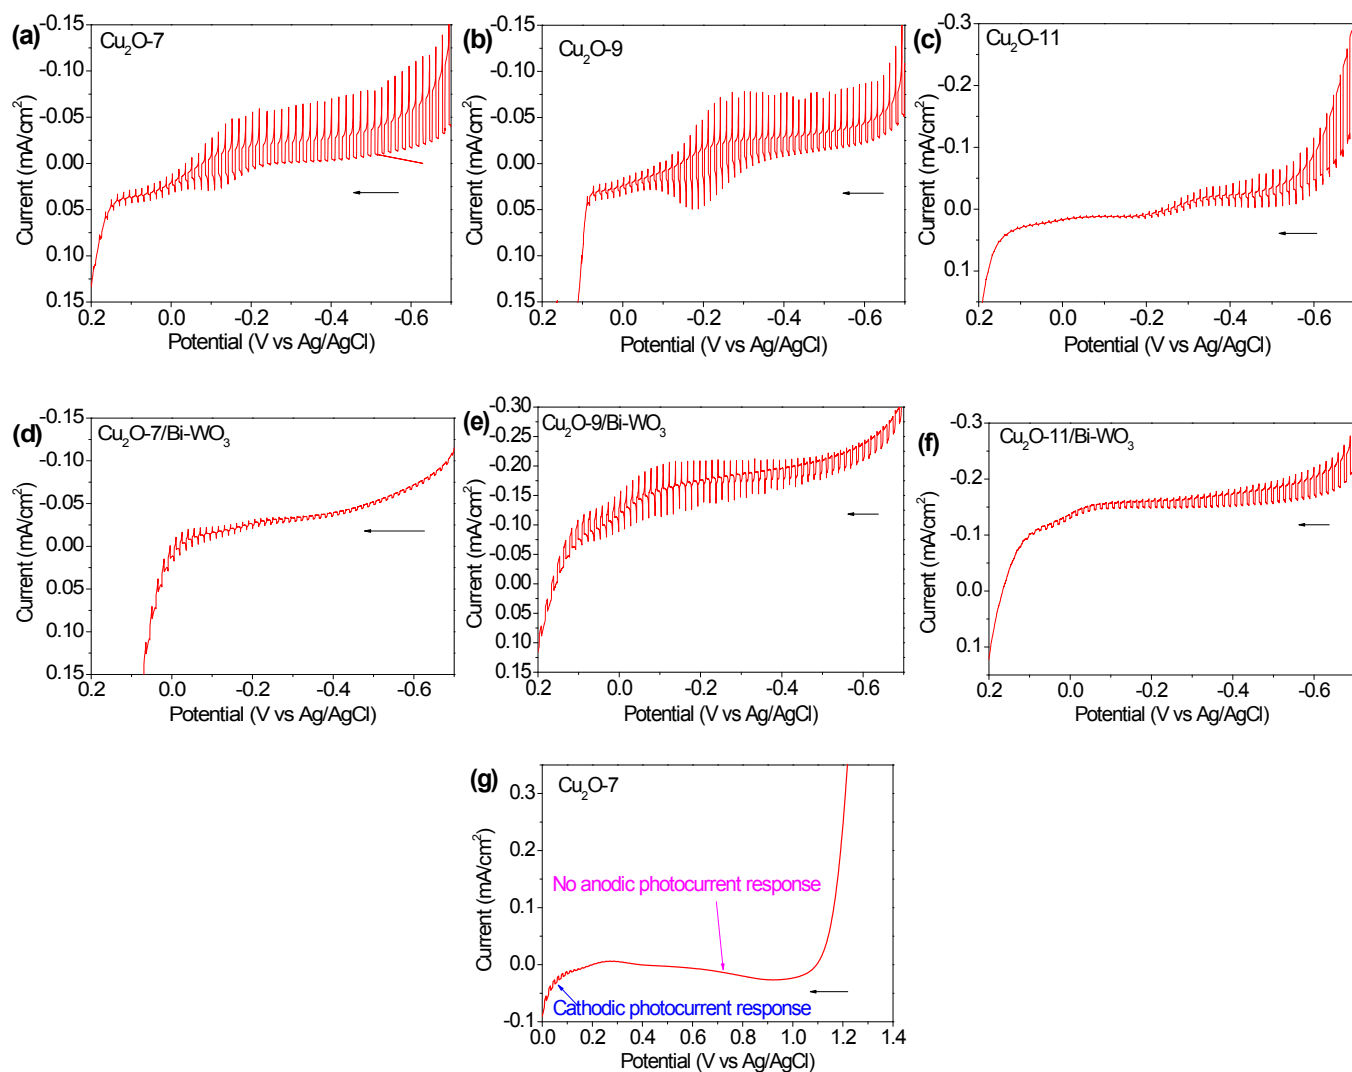

**Fig. S10** Cathodic photocurrents of (a)  $\text{Cu}_2\text{O}$ -7, (b)  $\text{Cu}_2\text{O}$ -9, (c)  $\text{Cu}_2\text{O}$ -11, (d)  $\text{Cu}_2\text{O}$ -7/ $\text{Bi-WO}_3$ , (e)  $\text{Cu}_2\text{O}$ -9/ $\text{Bi-WO}_3$  and (f)  $\text{Cu}_2\text{O}$ -11/ $\text{Bi-WO}_3$ , and (g) anodic photocurrent checking of  $\text{Cu}_2\text{O}$ -7 under the chopped 1 sun light illumination. The black arrows indicate the scanning direction.

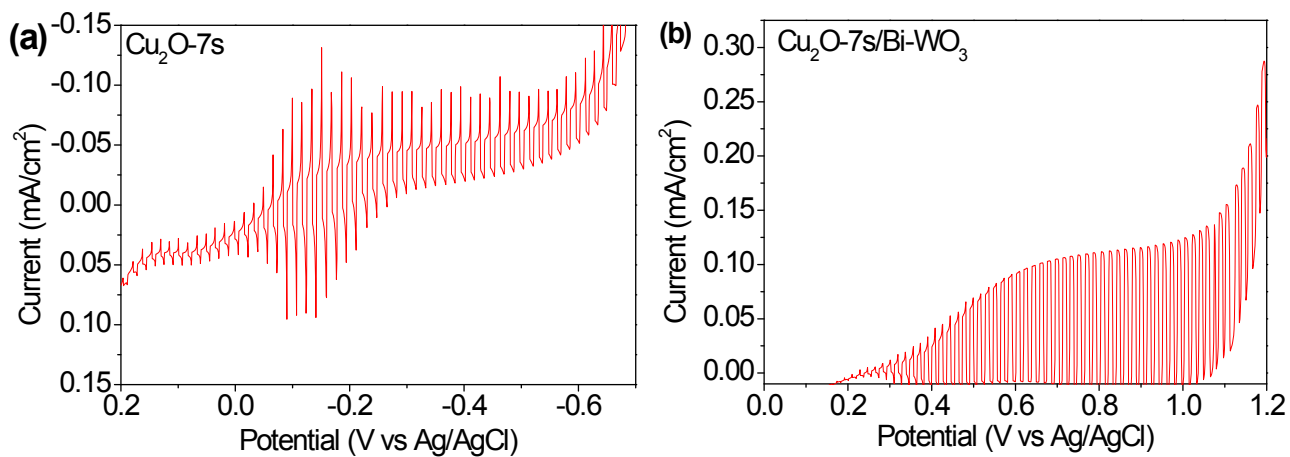

**Fig. S11** Photocurrents of (a)  $\text{Cu}_2\text{O-7s}$  and (b)  $\text{Cu}_2\text{O-7s/Bi-WO}_3$  films obtained by electrodeposition with stirring condition.

**References:**

- [1] J. Y. Zheng, G. Song, J. Hong, T. K. Van, A. U. Pawar, D. Y. Kim, C. W. Kim, Z. Haider and Y. S. Kang, *Cryst. Growth Des.*, 2014, **14**, 6057–6066.
